# Supplementary material for: Expression of Class I and Class II a/b Histone Deacetylase is Dysregulated in Hypertensive Animal Models
Source: PubMed Central journal article supplement — Korean Circ J. 2017 May 12;47(3):392–400. doi: 10.4070/kcj.2016.0266 (PMC5449534; doi:10.4070/kcj.2016.0266), 2017-05-12
Supplement: kcj-47-392-s001.pdf [file kcj-47-392-s001.pdf]

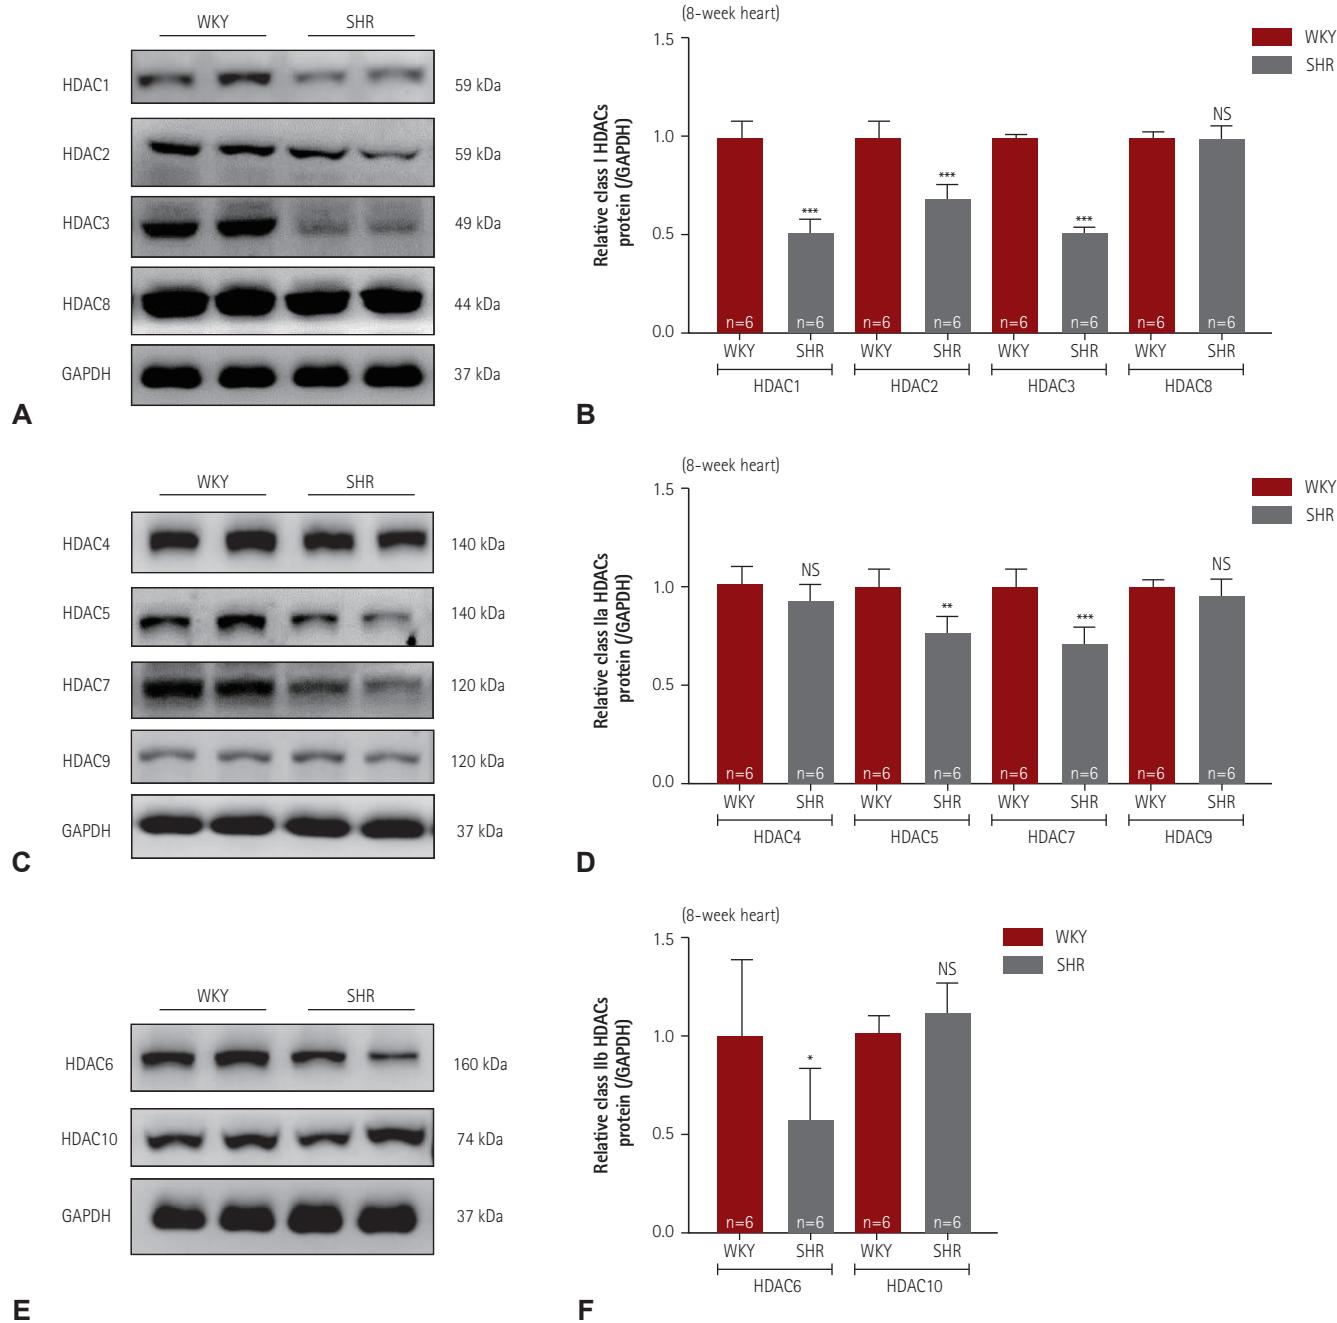

**Supplementary Fig. 1.** Class I and IIa/b HDAC expression levels in spontaneously hypertensive rats at 8 weeks of age. (A) Levels of class I HDAC (HDAC1, 2, 3, and 8) proteins were determined by western blot analysis, using left ventricular tissue from WKY rats (n=6) and SHR (n=6) at 8 weeks of age. GAPDH was used as a loading control. \*\*\*p<0.001 vs. WKY. (B) Protein levels were quantified by densitometry. (C) Levels of cardiac class IIa HDAC (HDAC4, 5, 7, and 9) proteins in SHR were assessed by western blot analysis. (D) Protein levels were quantified by densitometry. \*\*p<0.01 and \*\*\*p<0.001 vs. WKY. (E) Levels of cardiac class IIb HDAC (HDAC6 and 10) proteins were determined by western blot analysis. (F) Quantification of the class IIb HDACs. \*p<0.05 vs. WKY. NS: not significant, HDAC: histone deacetylase, SHR: spontaneously hypertensive rats, GAPDH: glyceraldehyde 3-phosphate dehydrogenase, WKY: Wistar-Kyoto.
